# Supplementary material for: Artificial insemination and parthenogenesis in the whitespotted bamboo shark Chiloscyllium plagiosum
Source: PubMed Central journal article supplement (PMC8116330; doi:10.1038/s41598-021-88568-y), 2021-05-13
Supplement: 41598_2021_88568_MOESM1_ESM.pdf [file 41598_2021_88568_MOESM1_ESM.pdf]

## Artificial insemination and parthenogenesis in the whitespotted bamboo shark *Chiloscyllium plagiosum*

Jennifer T. Wyffels, Lance M. Adams, Frank Bulman, Ari Fustukjian, Michael W. Hyatt, Kevin A. Feldheim and Linda M. Penfold

Supplemental Table 1. Inseminate characteristics and outcomes of whitespotted bamboo shark *Chiloscyllium plagiosum* artificial insemination trials

| Female ID | Male ID-Ejaculate | Total Motility | Inseminate Age | Semen Treatment | Sperm Number (million) | Wind Egg Cases | Egg Cases            |                   | Embryonic Death |
|-----------|-------------------|----------------|----------------|-----------------|------------------------|----------------|----------------------|-------------------|-----------------|
|           |                   |                |                |                 |                        |                | Before First Fertile | Fertile Egg Cases |                 |
| 854       | 320-E1            | ≥90%           | fresh          | extended        | 100                    | 2              | 2                    | 11                | 1               |
| 101       | 381-E2            | ≥90%           | fresh          | extended        | 750                    | 0              | 0                    | 17                | 2               |
| 283       | 381-E4            | ≥90%           | fresh          | extended        | 100                    | 0              | 3                    | 20                | 2               |
| 268       | 381-E5            | ≥90%           | fresh          | raw             | 100                    | 0              | 0                    | 21                | 7               |
| 793       | 395-E1            | ≥90%           | 24 hours^      | raw             | 100                    | 4              | 1                    | 12                | 0               |
| 036       | 320-E3            | ≥90%           | fresh          | raw             | 300                    | 2              | 2                    | 12                | 1               |
| 581       | 381-E1            | ≥90%           | fresh          | raw             | 750                    | 1              | 0                    | 4                 | 1               |
| 512       | 381-E3            | ≥90%           | fresh          | raw             | 100                    | 1              | 1                    | 3                 | 0               |
| 034       | 381-E3            | ≥90%           | fresh          | raw             | 100                    | 0              | 1                    | 5                 | 0               |
| 370       | 2969-E1           | 10%            | 24 hours*      | raw             | 750                    | 0              | 4                    | 2                 | 0               |
| 785       | 381-E4            | ≥90%           | fresh          | raw             | 100                    | 2              | 1                    | 1                 | 0               |
| 376       | 381-E1            | 75%            | 48 hours       | raw             | 750                    | 0              | 10                   | 1                 | 0               |
| 307       | 320-E1            | ≥90%           | fresh          | extended        | 100                    | 0              | 0                    | 3                 | 0               |
| 626       | 395-E1            | ≥90%           | 24 hours^      | extended        | 100                    | 14             | 3                    | 1                 | 0               |
| 583       | 395-E1            | ≥90%           | 24 hours^      | extended        | 100                    | 11             | 7                    | 1                 | 0               |
| 063       | 381-E2            | ≥90%           | fresh          | raw             | 750                    | 0              | -                    | -                 | -               |
| 775       | 381-E3            | ≥90%           | fresh          | raw             | 100                    | 0              | -                    | -                 | -               |
| 551       | 381-E5            | ≥90%           | fresh          | extended        | 100                    | 2              | -                    | -                 | -               |
| 065       | 320-E2            | ≥90%           | fresh          | extended        | 3.0                    | 5              | -                    | -                 | -               |
| 095       | 320-E2            | ≥90%           | fresh          | extended        | 3.0                    | 1              | -                    | -                 | -               |

\* semen shipped overnight from Adventure Aquarium, NJ, to Aquarium of the Pacific, CA

^ semen shipped overnight from The Florida Aquarium, FL, to Ripley's Aquarium of the Smokies, TN
